# Supplementary material for: Are varnishes based on other fluoride sources more efficacious in preventing or treating dental caries than NaF-based varnish? – A systematic review and meta-analysis
Source: Research Square preprint supplement (doi:10.21203/rs.3.rs-7491540/v1), 2025-09-17
Supplement: Supplementary file 1 [file 57ccf30b2e52432528dae563.pdf]

# PRISMA 2020 Checklist – Systematic Review on Fluoride Varnishes

| Section/Topic     | Item    | Checklist Item                                                              | Location where item is reported                     |
|-------------------|---------|-----------------------------------------------------------------------------|-----------------------------------------------------|
| TITLE             | 1       | Identify the report as a systematic review.                                 | Title page, p.1                                     |
| ABSTRACT          | 2       | See PRISMA 2020 for Abstracts checklist.                                    | Abstract, p.2                                       |
| INTRODUCTION      | 3       | Rationale for the review.                                                   | Introduction, p.3–4                                 |
|                   | 4       | Objectives (PICO).                                                          | Introduction, p.4                                   |
| METHODS           | 5       | Eligibility criteria.                                                       | Materials and Methods, p.4–5                        |
|                   | 6       | Information sources.                                                        | Materials and Methods, p.5                          |
|                   | 7       | Search strategy.                                                            | Materials and Methods, p.5–6; Supplementary Table 4 |
|                   | 8       | Selection process.                                                          | Materials and Methods, p.6                          |
|                   | 9       | Data collection process.                                                    | Materials and Methods, p.6–7                        |
|                   | 10a     | Data items (outcomes).                                                      | Materials and Methods, p.7                          |
|                   | 10b     | Other variables extracted.                                                  | Materials and Methods, p.7–8                        |
|                   | 11      | Study risk of bias assessment.                                              | Materials and Methods, p.8                          |
|                   | 12      | Effect measures.                                                            | Materials and Methods, p.8–9                        |
|                   | 13a–13e | Synthesis methods (eligibility, data prep, display, models, meta-analysis). | Materials and Methods, p.7–9                        |
|                   | 13f     | Sensitivity analyses.                                                       | Not performed (not applicable).                     |
|                   | 14      | Reporting bias assessment.                                                  | Not reported.                                       |
|                   | 15      | Certainty assessment (GRADE).                                               | Methods p.9; Results p.18–19; Table 3               |
| RESULTS           | 16a     | Study selection (numbers).                                                  | Results, p.10; Fig.1                                |
|                   | 16b     | Reasons for exclusions.                                                     | Results, p.10; Supplementary Table 5                |
|                   | 17      | Study characteristics.                                                      | Results, p.11–12; Table 1                           |
|                   | 18      | Risk of bias in studies.                                                    | Results, p.13; Fig.2                                |
|                   | 19      | Results of individual studies.                                              | Results, p.13–17; Table 2                           |
|                   | 20a     | Results of syntheses.                                                       | Results, p.17–19; Figures 3–5                       |
|                   | 20b     | Heterogeneity of syntheses.                                                 | Results, p.18–19 (I <sup>2</sup> values)            |
|                   | 20c     | Sensitivity analyses.                                                       | Not performed (not applicable).                     |
|                   | 21      | Reporting bias assessment in results.                                       | Not reported.                                       |
|                   | 22      | Certainty of evidence.                                                      | Results, p.19; Table 3                              |
| DISCUSSION        | 23a–d   | Interpretation, limitations, implications.                                  | Discussion, p.20–23                                 |
| OTHER INFORMATION | 24a     | Registration and protocol.                                                  | Other Info, p.24 (PROSPERO: CRD42023433773)         |
|                   | 24b     | Protocol deviations.                                                        | Not applicable (no deviations reported).            |
|                   | 25      | Support/funding.                                                            | Other Info, p.25                                    |
|                   | 26      | Competing interests.                                                        | Other Info, p.24                                    |
|                   | 27      | Availability of data/materials.                                             | Other Info, p.24–25 (Data_Extraction.xlsx)          |
